# Supplementary material for: Anaphase promoting complex–dependent degradation of transcriptional repressors Nrm1 and Yhp1 in Saccharomyces cerevisiae
Source: PubMed Central journal article supplement — Mol Biol Cell. 2011 Jul 1;22(13):2175–84. doi: 10.1091/mbc.E11-01-0031 (PMC3128521; doi:10.1091/mbc.e11-01-0031), 2011-07-01
Supplement: E11-01-0031_1.pdf [file E11-01-0031_1.pdf]

## **Supplemental Material**

**Supplemental Table I. M-to-G1 expression ratios of analyzed proteins.** The expression of TAP-tagged versions of the indicated proteins in M phase and in G1 were determined by immunoblotting as described in the text. The Pathway, Function and Location of each protein is taken from standard annotations, <http://www.yeastgenome.org/>. n/d, not detectable.

## Supplemental Table 1

| ORF     | Name  | M/G1 ratio | Pathway                                                               | Function                                           | Location                                 |
|---------|-------|------------|-----------------------------------------------------------------------|----------------------------------------------------|------------------------------------------|
| YEL061C | CIN8  | 10         | mitotic sister chromatid segregation*                                 | microtubule motor activity                         | mitochondrion*                           |
| YDL028C | MPS1  | 10         | mitotic spindle checkpoint*                                           | protein threonine/tyrosine kinase activity         | spindle pole body*                       |
| YGL021W | ALK1  | 10         | mitosis                                                               | protein serine/threonine kinase activity           | nucleus                                  |
| YHR152W | SPO12 | 10         | regulation of exit from mitosis*                                      | molecular function unknown                         | nucleus*                                 |
| YPR119W | CLB2  | 10         | G2/M transition of mitotic cell cycle*                                | cyclin-dependent protein kinase regulator activity | cytoplasm*                               |
| YNL273W | TOF1  | 10         | mitotic sister chromatid cohesion*                                    | molecular function unknown                         | nuclear chromosome                       |
| YNR009W | NRM1  | 10         | biological process unknown                                            | molecular function unknown                         | cytoplasm*                               |
| YPL183C |       | 10         | biological process unknown                                            | molecular function unknown                         | cytoplasm                                |
| YMR163C | INP2  | 10         | biological process unknown                                            | molecular function unknown                         | cytoplasm                                |
| YBR138C |       | 10         | biological process unknown                                            | molecular function unknown                         | cytoplasm                                |
| YPR106W | ISR1  | 10         | biological process unknown                                            | protein kinase activity                            | cellular component unknown               |
| YHR061C | GIC1  | 10         | establishment of cell polarity (sensu Fungi)*                         | small GTPase regulator activity                    | bud neck*                                |
| YER032W | FIR1  | 10         | mRNA polyadenylation                                                  | molecular function unknown                         | bud neck                                 |
| YDR451C | YHP1  | 10         | negative regulation of transcription from RNA polymerase II promoter* | DNA binding*                                       | nuclear chromosome<br>cellular component |
| YPL267W | ACM1  | 10         | biological process unknown                                            | molecular function unknown                         | unknown                                  |
| YPL242C | IQG1  | 8          | actin filament organization*                                          | cytoskeletal protein binding                       | bud neck contractile ring                |
| YER111C | SWI4  | 5          | G1/S transition of mitotic cell cycle*                                | DNA binding*                                       | nucleus                                  |
| YBR054W | YRO2  | 5          | biological process unknown                                            | molecular function unknown                         | mitochondrion*                           |
| YML064C | TEM1  | 5          | regulation of exit from mitosis                                       | protein binding*                                   | spindle pole body                        |
| YLR131C | ACE2  | 5          | G1-specific transcription in mitotic cell cycle                       | transcriptional activator activity                 | nucleus*                                 |
| YMR001C | CDC5  | 5          | protein amino acid phosphorylation*                                   | protein kinase activity*                           | nucleus*                                 |
| YMR032W | HOF1  | 5          | cytokinesis*                                                          | cytoskeletal protein binding                       | bud neck contractile ring                |
| YGR108W | CLB1  | 5          | G2/M transition of mitotic cell cycle*                                | cyclin-dependent protein kinase regulator activity | cytoplasm*                               |
| YKL112W | ABF1  | 5          | DNA replication*                                                      | DNA binding*                                       | nuclear chromatin                        |

## Supplemental Table 1

|         |      |   |                                                                             |                                                                  |                                                               |
|---------|------|---|-----------------------------------------------------------------------------|------------------------------------------------------------------|---------------------------------------------------------------|
| YIL101C | XBP1 | 5 | response to stress                                                          | transcription factor activity<br>protein serine/threonine kinase | nucleus                                                       |
| YOL113W | SKM1 | 5 | protein amino acid phosphorylation*                                         | activity                                                         | plasma membrane                                               |
| YCL014W | BUD3 | 4 | cytokinesis*                                                                | molecular function unknown                                       | bud neck*                                                     |
| YJR053W | BFA1 | 4 | conjugation with cellular fusion*                                           | GTPase activator activity                                        | spindle pole body                                             |
| YKL130C | SHE2 | 3 | intracellular mRNA localization                                             | mRNA binding                                                     | cytoplasm                                                     |
| YHR023W | MYO1 | 3 | response to osmotic stress*<br>nuclear migration, microtubule-<br>mediated* | microfilament motor activity                                     | bud neck contractile ring                                     |
| YPL155C | KIP2 | 3 |                                                                             | microtubule motor activity<br>protein serine/threonine kinase    | mitochondrion*                                                |
| YGR092W | DBF2 | 2 | protein amino acid phosphorylation*                                         | activity                                                         | bud neck*                                                     |
| YNL088W | TOP2 | 2 | meiotic recombination*                                                      | DNA topoisomerase (ATP-<br>hydrolyzing) activity                 | nucleus*                                                      |
| YGR188C | BUB1 | 2 | protein amino acid phosphorylation*<br>mitotic spindle organization and     | protein binding*                                                 | nucleus*                                                      |
| YGL216W | KIP3 | 2 | biogenesis in nucleus*                                                      | microtubule motor activity                                       | cytoplasmic microtubule*                                      |
| YPR156C | TPO3 | 2 | polyamine transport                                                         | spermine transporter activity                                    | plasma membrane*<br>contractile ring (sensu<br>Saccharomyces) |
| YJR092W | BUD4 | 2 | bud site selection*                                                         | GTP binding                                                      | mitochondrion*                                                |
| YLR190W | MMR1 | 2 | mitochondrion inheritance                                                   | molecular function unknown                                       | cytoplasm*                                                    |
| YOR355W | GDS1 | 2 | aerobic respiration                                                         | molecular_function unknown                                       | cellular component                                            |
| YMR102C |      | 2 | biological process unknown                                                  | molecular function unknown                                       | unknown                                                       |
| YOR233W | KIN4 | 2 | spindle orientation checkpoint<br>mitotic spindle organization and          | protein kinase activity<br>structural constituent of             | bud neck*                                                     |
| YLR045C | STU2 | 2 | biogenesis in nucleus*<br>establishment of cell polarity (sensu<br>Fungi)*  | cytoskeleton*                                                    | spindle pole body*                                            |
| YBL085W | BOI1 | 2 |                                                                             | phospholipid binding                                             | bud neck*<br>cellular component                               |
| YBR007C | DSF2 | 2 | biological process unknown                                                  | molecular function unknown                                       | unknown                                                       |
| YOR026W | BUB3 | 1 | mitotic spindle checkpoint                                                  | molecular function unknown                                       | condensed nuclear<br>chromosome kinetochore                   |
| YGR211W | ZPR1 | 1 | regulation of cell cycle                                                    | protein binding                                                  | cytoplasm*                                                    |

## Supplemental Table 1

|         |        |   |                                                         |                                                               |                                           |
|---------|--------|---|---------------------------------------------------------|---------------------------------------------------------------|-------------------------------------------|
| YML085C | TUB1   | 1 | mitotic sister chromatid segregation*                   | structural constituent of cytoskeleton                        | spindle pole body*                        |
| YLR045C | STU2   | 1 | mitotic spindle organization and biogenesis in nucleus* | structural constituent of cytoskeleton*                       | spindle pole body*<br>cellular component  |
| YML034W | SRC1   | 1 | mitotic sister chromatid segregation                    | molecular function unknown                                    | unknown                                   |
| YMR168C | CEP3   | 1 | mitotic spindle checkpoint                              | DNA bending activity*                                         | condensed nuclear chromosome kinetochore  |
| YMR029C | FAR8   | 1 | cell cycle arrest in response to pheromone              | molecular function unknown                                    | cellular component                        |
| YHR129C | ARP1   | 1 | mitotic anaphase B                                      | structural constituent of cytoskeleton                        | unknown                                   |
| YCL016C | DCC1   | 1 | mitotic sister chromatid cohesion                       | molecular_function unknown                                    | dynactin complex                          |
| YDR517W | GRH1   | 1 | mitotic spindle checkpoint                              | molecular_function unknown                                    | DNA replication factor                    |
| YER016W | BIM1   | 1 | microtubule nucleation*                                 | structural constituent of cytoskeleton                        | C complex                                 |
| YOR083W | WHI5   | 1 | G1/S transition of mitotic cell cycle*                  | transcriptional repressor activity                            | cytoplasm                                 |
| YKL052C | ASK1   | 1 | mitotic spindle organization and biogenesis in nucleus* | structural constituent of cytoskeleton                        | condensed nuclear chromosome kinetochore* |
| YKR083C | DAD2   | 1 | mitotic spindle assembly (sensu Fungi)                  | structural constituent of cytoskeleton                        | condensed nuclear chromosome kinetochore* |
| YPL174C | NIP100 | 1 | mitotic anaphase B                                      | protein binding*                                              | dynactin complex                          |
| YBR133C | HSL7   | 1 | regulation of progression through cell cycle*           | protein-arginine N-methyltransferase activity                 | bud neck                                  |
| YDL003W | MCD1   | 1 | mitotic sister chromatid cohesion*                      | molecular_function unknown                                    | nuclear cohesin complex                   |
| YOR372C | NDD1   | 1 | G2/M-specific transcription in mitotic cell cycle       | transcriptional activator activity                            | nucleus                                   |
| YNL078W | NIS1   | 1 | regulation of mitosis                                   | molecular function unknown                                    | nucleus*                                  |
| YIL122W | POG1   | 1 | G1/S-specific transcription in mitotic cell cycle*      | specific RNA polymerase II transcription factor activity      | nucleus                                   |
| YGL008C | PMA1   | 1 | regulation of pH*                                       | hydrogen-exporting ATPase activity, phosphorylative mechanism | plasma membrane*                          |

## Supplemental Table 1

|         |       |   |                                                                                            |                                                                          |                                 |
|---------|-------|---|--------------------------------------------------------------------------------------------|--------------------------------------------------------------------------|---------------------------------|
| YMR031C |       | 1 | biological process unknown                                                                 | molecular function unknown                                               | cytoplasm*                      |
| YIL106W | MOB1  | 1 | protein amino acid phosphorylation*                                                        | kinase regulator activity                                                | bud neck*<br>cellular component |
| YML034W | SRC1  | 1 | mitotic sister chromatid segregation                                                       | molecular function unknown                                               | unknown                         |
| YBL023C | MCM2  | 1 | DNA replication initiation*                                                                | chromatin binding*<br>protein serine/threonine kinase activity           | cytoplasm*                      |
| YHR205W | SCH9  | 1 | protein amino acid phosphorylation*                                                        | activity                                                                 | cytoplasm*                      |
| YHR215W | PHO12 | 1 | biological process unknown<br>regulation of transcription from RNA polymerase II promoter* | acid phosphatase activity                                                | vacuole (sensu Fungi)           |
| YGL162W | SUT1  | 1 | polymerase II promoter*                                                                    | transcription factor activity*                                           | nucleus                         |
| YJL079C | PRY1  | 1 | biological_process unknown                                                                 | molecular_function unknown                                               | endoplasmic reticulum*          |
| YDR150W | NUM1  | 1 | nuclear migration (sensu Fungi)*                                                           | tubulin binding                                                          | bud tip*                        |
| YHR135C | YCK1  | 1 | protein amino acid phosphorylation*                                                        | casein kinase I activity                                                 | endoplasmic reticulum*          |
| YPR019W | CDC54 | 1 | DNA replication initiation*                                                                | chromatin binding*<br>protein serine/threonine kinase activity           | cytoplasm*                      |
| YPR111W | DBF20 | 1 | protein amino acid phosphorylation*                                                        | alcohol O-acetyltransferase activity                                     | cytoplasm                       |
| YGR177C | ATF2  | 1 | steroid metabolism                                                                         | activity                                                                 | cytoplasm*                      |
| YJR043C | POL32 | 1 | telomere maintenance*<br>regulation of transcription from RNA polymerase II promoter*      | delta DNA polymerase activity*                                           | nucleus*                        |
| YGL162W | SUT1  | 1 | polymerase II promoter*                                                                    | transcription factor activity*<br>structural constituent of cytoskeleton | nucleus                         |
| YPL255W | BBP1  | 1 | microtubule nucleation*                                                                    | protein serine/threonine kinase activity                                 | spindle pole body               |
| YKL048C | ELM1  | 1 | protein amino acid phosphorylation*<br>nuclear migration, microtubule-mediated*            | activity                                                                 | bud neck contractile ring       |
| YDR488C | PAC11 | 1 |                                                                                            | microtubule motor activity*<br>protein phosphatase type 2A activity      | cytoplasmic microtubule*        |
| YGL190C | CDC55 | 1 | protein biosynthesis*                                                                      | activity                                                                 | nucleus*                        |
| YPR040W | TIP41 | 1 | signal transduction<br>nucleotide-excision repair, DNA damage recognition*                 | molecular_function unknown                                               | cytoplasm*                      |
| YEL037C | RAD23 | 1 | damage recognition*                                                                        | damaged DNA binding                                                      | repairosome*                    |
| YLR114C | EFR4  | 1 | biological_process unknown                                                                 | molecular_function unknown                                               | cytoplasm                       |
| YIR004W | DJP1  | 1 | peroxisome matrix protein import                                                           | chaperone binding                                                        | cytosol                         |

## Supplemental Table 1

|         |       |   |                                                                                        |                                                                           |                                                       |
|---------|-------|---|----------------------------------------------------------------------------------------|---------------------------------------------------------------------------|-------------------------------------------------------|
| YDR505C | PSP1  | 1 | biological_process unknown                                                             | molecular_function unknown<br>specific transcriptional repressor activity | cytoplasm*                                            |
| YKL185W | ASH1  | 1 | pseudohyphal growth*                                                                   |                                                                           | nucleus*                                              |
| YHR030C | SLT2  | 1 | cell wall organization and biogenesis*<br>nuclear mRNA splicing, via spliceosome*      | MAP kinase activity                                                       | cytoplasm*                                            |
| YLR132C |       | 1 |                                                                                        | molecular_function unknown                                                | cytoplasm*<br>nuclear telomere cap complex            |
| YDL220C | CDC13 | 1 | telomere maintenance*                                                                  | single-stranded DNA binding                                               | nucleus                                               |
| YPL008W | CHL1  | 1 | chromosome segregation*                                                                | DNA helicase activity                                                     | nuclear origin of replication recognition complex     |
| YBR060C | ORC2  | 1 | DNA replication initiation*<br>osmosensory signaling pathway via two-component system* | DNA replication origin binding                                            | cytoplasm                                             |
| YLR006C | SSK1  | 1 |                                                                                        | enzyme activator activity*                                                | nucleus*                                              |
| YNL097C | PHO23 | 1 | chromatin modification                                                                 | histone deacetylase activity                                              |                                                       |
| YDR448W | ADA2  | 1 | histone acetylation*                                                                   | transcription coactivator activity                                        | SAGA complex*                                         |
| YGL066W | SGF73 | 1 | histone acetylation                                                                    | molecular_function unknown                                                | SAGA complex<br>cellular_component                    |
| YLR352W |       | 1 | biological_process unknown                                                             | molecular_function unknown                                                | unknown                                               |
| YMR259C |       | 1 | biological process unknown                                                             | molecular function unknown                                                | cytoplasm                                             |
| YNR031C | SSK2  | 1 | protein amino acid phosphorylation*                                                    | MAP kinase kinase kinase activity                                         | cytosol<br>small nucleolar ribo-nucleoprotein complex |
| YML093W | UTP14 | 1 | processing of 20S pre-rRNA                                                             | snoRNA binding                                                            | kinetochore*                                          |
| YPL233W | NSL1  | 1 | chromosome segregation                                                                 | molecular function unknown                                                | cytoplasm*                                            |
| YLR182W | SWI6  | 1 | meiosis*                                                                               | protein binding*                                                          | cytoplasm                                             |
| YBR094W |       | 1 | biological process unknown                                                             | molecular function unknown                                                | nuclear exosome (RNase complex)                       |
| YOR001W | RRP6  | 1 | 35S primary transcript processing*                                                     | 3'-5'-exoribonuclease activity                                            | spindle pole body*                                    |
| YPR141C | KAR3  | 1 | meiosis*                                                                               | microtubule motor activity*                                               | nucleus                                               |
| YMR019W | STB4  | 1 | biological process unknown                                                             | DNA binding                                                               | kinetochore*                                          |
| YIR010W | DSN1  | 1 | chromosome segregation                                                                 | molecular function unknown                                                |                                                       |

## Supplemental Table 1

|         |        |     |                                                                                        |                                                            |                                                      |
|---------|--------|-----|----------------------------------------------------------------------------------------|------------------------------------------------------------|------------------------------------------------------|
|         |        |     |                                                                                        |                                                            | Ada2/Gcn5/Ada3<br>transcription activator<br>complex |
| YOR023C | AHC1   | 1   | histone acetylation                                                                    | histone acetyltransferase activity                         | cytoplasm*                                           |
| YLR187W | SKG3   | 1   | biological process unknown                                                             | molecular function unknown                                 | cytoplasm*                                           |
| YBL060W |        | 1   | biological process unknown                                                             | molecular function unknown                                 | cytoplasm*                                           |
| YLR335W | NUP2   | 1   | mRNA export from nucleus*                                                              | structural molecule activity                               | mitochondrion*                                       |
|         |        |     | microtubule cytoskeleton organization<br>and biogenesis                                | molecular function unknown                                 | cell wall (sensu Fungi)                              |
| YIL123W | SIM1   | 1   | intracellular protein transport*                                                       | molecular_function unknown                                 | cytosol                                              |
| YGR142W | BTN2   | 1   | chromosome segregation*                                                                | centromeric DNA binding                                    | nucleus*                                             |
| YKLO89W | MIF2   | 1   | ubiquitin-dependent protein<br>catabolism*                                             | protein binding*                                           | cytoplasm*                                           |
| YJL047C | RTT101 | 1   | mRNA catabolism*                                                                       | mRNA binding*                                              | cytoplasmic mRNA<br>processing body                  |
| YOL149W | DCP1   | 1   | chromatin remodeling*                                                                  | general RNA polymerase II<br>transcription factor activity | SWI/SNF complex*                                     |
| YBR289W | SNF5   | 1   | negative regulation of transcription<br>from RNA polymerase II promoter*               | DNA binding*                                               | nucleus                                              |
| YML027W | YOX1   | 0.2 | pseudohyphal growth*                                                                   | signal transducer activity*                                | intracellular                                        |
| YDR379W | RGA2   | 0.2 | biological process unknown                                                             | molecular function unknown                                 | cytoplasm                                            |
| YDR266C |        | 0.2 | pheromone-dependent signal<br>transduction during conjugation with<br>cellular fusion* | cyclin-dependent protein kinase<br>inhibitor activity      | cytoplasm*                                           |
| YJL157C | FAR1   | 0.1 | negative regulation of exit from<br>mitosis*                                           | protein binding                                            | cytoplasm*                                           |
| YBR158W | AMN1   | n/d | G2/M transition of mitotic cell cycle*                                                 | molecular_function unknown                                 | half bridge of spindle<br>pole body                  |
| YLL003W | SFI1   | n/d | mitotic sister chromatid segregation*                                                  | molecular function unknown                                 | nucleus*                                             |
| YOR073W | SGO1   | n/d | biological_process unknown                                                             | protein kinase activity                                    | cytoplasm                                            |
| YPL141C |        | n/d | DNA replication initiation*                                                            | chromatin binding*                                         | cytoplasm*                                           |
| YBR202W | CDC47  | n/d | chromatin silencing at telomere*                                                       | DNA binding                                                | nucleus                                              |
| YOR025W | HST3   | n/d | actin cytoskeleton organization and<br>biogenesis*                                     | molecular_function unknown                                 | bud neck*                                            |
| YPR171W | BSP1   | n/d | mitotic sister chromatid segregation*                                                  | motor activity                                             | spindle pole body*                                   |
| YKR054C | DYN1   | n/d |                                                                                        |                                                            |                                                      |

## Supplemental Table 1

|         |      |     |                                    |                               |                               |
|---------|------|-----|------------------------------------|-------------------------------|-------------------------------|
| YOR191W | RIS1 | n/d | chromatin assembly or disassembly* | DNA-dependent ATPase activity | nucleus<br>cellular component |
| YFR039C |      | n/d | biological process unknown         | molecular function unknown    | unknown                       |



**Supplementary Table II.** *S. cerevisiae* strains used in this study.

| <b>Strain</b>    | <b>Relevant Genotype</b>                                                      | <b>Source</b>                    |
|------------------|-------------------------------------------------------------------------------|----------------------------------|
| YJB14<br>(W303a) | <i>MATa ade2-1 trp1-1 leu2-3,112 his3-11,15 ura3-1 bar1::URA3</i>             | (Burton and Solomon, 2000)       |
| YJB115           | <i>MATa cdc23-1 bar1::URA3</i>                                                | (Burton and Solomon, 2000)       |
| YJB200           | <i>MATa cdc15-2</i>                                                           | (Burton and Solomon, 2000)       |
| DOY734           | <i>MATa cdc15-2 cdh1Δ::natMX4</i>                                             | This study                       |
| YJB368           | <i>MATa cdc28-13::TRP1 cdh1Δ::LEU2</i>                                        | (Burton and Solomon, 2000)       |
| YJB910           | <i>MATa pep4-3 leu2-3,112 his3-1,15 ura3-1 CDC16-TAP::CDC16 APC4-HA::APC4</i> | (Ostapenko <i>et al.</i> , 2008) |
| PJ69-4a          | <i>MATa LYS2::GAL1-HIS3 GAL2-ADE2 met2::GAL7-lacZ</i>                         | (James <i>et al.</i> , 1996)     |
| A6808            | <i>MATa URA3::MET-CDC20</i>                                                   | (D'Aquino <i>et al.</i> , 2005)  |
| CDC28-as1        | <i>MATa cdc28-as</i>                                                          | (Bishop <i>et al.</i> , 2000)    |
| DOY1006          | YJB14 [ <i>GAL-NRMI-TAP-YCplac22</i> ]                                        | This study                       |
| DOY1070          | YJB14 [ <i>GAL-YHP1-TAP-YCplac22</i> ]                                        | This study                       |
| DOY1007          | YJB14 [ <i>GAL-nrm1-mdb-TAP-YCplac22</i> ]                                    | This study                       |
| DOY1098          | YJB14 [ <i>GAL-yhp1-mkb/mdb-TAP-YCplac22</i> ]                                | This study                       |
| DOY1277          | YJB14 [ <i>GAL-nrm1-4TA-TAP-YCplac22</i> ]                                    | This study                       |
| DOY1355          | YJB14 [ <i>GAL-nrm1-4TD-TAP-YCplac22</i> ]                                    | This study                       |
| DOY1056          | YJB14 [ <i>nrm1Δ::natMX4</i> ]                                                | This study                       |
| DOY1103          | YJB14 [ <i>yhp1Δ::natMX4</i> ]                                                | This study                       |
| DOY1057          | YJB14 [ <i>nrm1Δ URA3:NRMIp-NRMI-TAP</i> ]                                    | This study                       |

|         |                                                                     |            |
|---------|---------------------------------------------------------------------|------------|
| DOY1058 | YJB14 [ <i>nrm1</i> Δ:: <i>natMX4 URA3:NRM1p-nrm1-mdb</i> -TAP]     | This study |
| DOY1157 | YJB14 [ <i>yhp1</i> Δ:: <i>natMX4 URA3:YHP1p-YHP1</i> -TAP]         | This study |
| DOY1158 | YJB14 [ <i>yhp1</i> Δ:: <i>natMX4 URA3:YHP1p-yhp1-mkb/mdb</i> -TAP] | This study |
| DOY1036 | YJB14 [ <i>HIS3:NRM1</i> -TAP <i>URA:GALL-cdh1-m11</i> ]            | This study |
| DOY1065 | YJB14 [ <i>HIS3:YHP1</i> -TAP <i>URA:GALL-cdh1-m11</i> ]            | This study |
| DOY1030 | YJB115 [ <i>GAL-NRM1</i> -TAP-YCplac22]                             | This study |
| DOY1073 | YJB368 [ <i>GAL-YHP1</i> -TAP-YCplac22]                             | This study |
| DOY1090 | YJB200 [ <i>HIS3:YHP1</i> -TAP]                                     | This study |
| DOY1091 | DOY734 [ <i>HIS3:YHP1</i> -TAP]                                     | This study |
| DOY1124 | A6808 [ <i>LEU2:YHP1p-YHP1</i> -TAP]                                | This study |
| DOY1125 | A6808 [ <i>LEU2:YHP1p-yhp1-mkb/mdb</i> -TAP]                        | This study |
| DOY1137 | A6808 [ <i>LEU2:NRM1p-NRM1</i> -TAP]                                | This study |
| DOY1148 | A6808 [ <i>LEU2:NRM1p-nrm1-mdb</i> -TAP]                            | This study |
| DOY1021 | CDC28-as1 [ <i>GAL-NRM1</i> -TAP-YCplac22]                          | This study |
| DOY1153 | CDC28-as1 [ <i>GAL-nrm1-mdb</i> -TAP-YCplac22]                      | This study |
| DOY1236 | PJ69-4a [ <i>CDH1-ΔN200</i> -pAS1 <i>YHP1</i> -pACT]                | This study |
| DOY1240 | PJ69-4a [ <i>CDH1-ΔN200</i> -pAS1 <i>yhp1-mkb/mdb</i> -pACT]        | This study |
